# Supplementary material
Source: publisher figshare collection journal article supplement (https://tandf.figshare.com/articles/dataset/_/24566669)
Supplement: Supplementary file 1 [file 1]

Supplementary Table S1: List of antibodies used for characterization of chondroprogenitors by flow cytometric analysis.

| **Groups** | **Surface Markers** | | **Fluorochrome**  **Conjugate** | **Catalogue number** | **Source** |
| --- | --- | --- | --- | --- | --- |
| **Group I:**  Positive MSC markers | CD105: Endoglin glycoprotein | | FITC | 561443 | BD Bioscience |
| CD73: Ecto-5’- nucleotidase | | PE | 550257 | BD Bioscience |
| CD90: Thymus cell antigen 1 | | PE | 555596 | BD Bioscience |
| CD106 | | APC | 551147 | BD Bioscience |
| **Group II:**  Negative MSC markers | CD34 | Hematopoietic stem cell markers | PE | 348057 | BD Bioscience |
| CD45 | FITC | 555482 | BD Bioscience |
| CD14: Monocyte/macrophage marker | | FITC | 555397 | BD Bioscience |
| **Group III:**  Integrin markers | CD29: Integrin beta-1 (Iβ1) | | APC | 559883 | BD Bioscience |
| CD49e: Integrin alpha 5; (Iα5) Fibronectin receptor | | PE | 555617 | BD Bioscience |
| CD49b: Integrin alpha 2; (Iα2) | | FITC | MACS 130/100337 | Miltenyl Biotec |
| **Group IV:**  Potential markers of enhanced chondrogenesis | CD146: Melanoma cell adhesion molecule | | PE | 550315 | BD Bioscience |
| CD166: Activated leucocyte adhesion molecule | | BB515 | 564561 | BD Bioscience |
| Podoplanin: Type I integral membrane glycoprotein | | BV421 | 566456 | BD Bioscience |
| **Group V:**  Immunogenic markers | HLA-ABC: Human Leukocyte Class I | | PE | 560964 | BD Bioscience |
| HLA-DR: Human Leucocyte Class II | | V500 | 561225 | BD Bioscience |
| CD80: HLA-II costimulatory marker | | BB515 | 565009 | BD Bioscience |
| CD86: HLA-II costimulatory marker | | BV421 | 562433 | BD Bioscience |
|  |  | |  |  |  |

[[1]](#footnote-1)

1. MSC: mesenchymal stem cell, CD: cluster of differentiation, FITC: fluorescein isothiocyanate, PE: phycoerythrin, APC: allophycocyanin, BB515: Horizon brilliant blue 515, BV421: Brilliant violet 421 and V500: Violet 500. [↑](#footnote-ref-1)
